# Supplementary material for: Fluid Components in Cordierite from the Rocks of Epidote-Amphibole Facies of the Muzkol Metamorphic Complex, Tajikistan: Pyrolysis-Free GC-MS Data
Source: MDPI journal article supplement (doi:10.3390/min13030323), 2023-02-24
Supplement: s1 [file s1]

**Table S6.** Results of the GC-MS analysis of the gas phase extracted during shock destruction of cordierite № 6 (Muzkol complex, Pamir, Tajikistan, species diversity of 165 components).

| Formula                         | Name                        | <sup>1</sup> CAS | <sup>2</sup> MW | Cordierite №6        |                   |
|---------------------------------|-----------------------------|------------------|-----------------|----------------------|-------------------|
|                                 |                             |                  |                 | <sup>3</sup> RT, min | <sup>4</sup> A, % |
| Aliphatic hydrocarbons          |                             |                  |                 |                      |                   |
| Paraffins                       |                             |                  |                 |                      |                   |
| CH <sub>4</sub>                 | Methane                     | 74-82-8          | 32              | 1.88                 | 0.004             |
| C <sub>2</sub> H <sub>6</sub>   | Ethane                      | 74-84-0          | 30              | 2.73                 | 0.023             |
| C <sub>3</sub> H <sub>8</sub>   | n-Propane                   | 74-98-6          | 44              | 4.63                 | 0.008             |
| C <sub>4</sub> H <sub>10</sub>  | Isobutane                   | 75-28-5          | 58              | 6.68                 | 0.064             |
| C <sub>4</sub> H <sub>10</sub>  | n-Butane                    | 106-97-8         | 58              | 6.99                 | 0.004             |
| C <sub>5</sub> H <sub>12</sub>  | n-Pentane                   | 109-66-0         | 72              | 9.48                 | 0.050             |
| C <sub>6</sub> H <sub>14</sub>  | n-Hexane                    | 110-54-3         | 86              | 13.06                | 0.014             |
| C <sub>7</sub> H <sub>16</sub>  | n-Heptane                   | 142-82-5         | 100             | 17.52                | 0.051             |
| C <sub>8</sub> H <sub>16</sub>  | 3-Methyleneheptane          | 1632-16-2        | 112             | 21.08                | 0.101             |
| C <sub>8</sub> H <sub>18</sub>  | n-Octane                    | 111-65-9         | 114             | 21.82                | 0.040             |
| C <sub>9</sub> H <sub>20</sub>  | n-Nonane                    | 111-84-2         | 128             | 25.81                | 0.068             |
| C <sub>10</sub> H <sub>22</sub> | n-Decane                    | 124-18-5         | 142             | 29.48                | 0.031             |
| C <sub>11</sub> H <sub>24</sub> | n-Undecane                  | 1120-21-4        | 156             | 32.59                | 0.038             |
| C <sub>12</sub> H <sub>26</sub> | n-Dodecane                  | 112-40-3         | 170             | 36.52                | 0.022             |
| C <sub>13</sub> H <sub>28</sub> | n-Tridecane                 | 629-50-5         | 184             | 41.90                | 0.038             |
| C <sub>14</sub> H <sub>30</sub> | n-Tetradecane               | 629-59-4         | 198             | 50.39                | 0.046             |
| C <sub>15</sub> H <sub>32</sub> | 5-Methyltetradecane         | 25117-32-2       | 212             | 53.87                | 0.219             |
| C <sub>15</sub> H <sub>32</sub> | n-Pentadecane               | 629-62-9         | 212             | 63.90                | 0.097             |
| C <sub>16</sub> H <sub>34</sub> | n-Hexadecane                | 544-76-3         | 226             | 85.75                | 0.019             |
| C <sub>17</sub> H <sub>36</sub> | n-Heptadecane               | 629-78-7         | 240             | 121.13               | 0.022             |
| Olefins                         |                             |                  |                 |                      |                   |
| C <sub>2</sub> H <sub>4</sub>   | Ethylene                    | 74-85-1          | 28              | 2.51                 | 0.016             |
| C <sub>3</sub> H <sub>6</sub>   | 1-Propene                   | 115-07-1         | 42              | 4.43                 | 0.025             |
| C <sub>4</sub> H <sub>8</sub>   | 2-Methyl-1-propene          | 115-11-7         | 56              | 6.43                 | 0.071             |
| C <sub>5</sub> H <sub>8</sub>   | 1,4-Pentadiene              | 591-93-5         | 68              | 8.68                 | 0.001             |
| C <sub>5</sub> H <sub>10</sub>  | 1-Pentene                   | 109-67-1         | 70              | 9.09                 | 0.037             |
| C <sub>5</sub> H <sub>8</sub>   | (E)-1,3-Pentadiene          | 2004-70-8        | 68              | 9.31                 | 0.042             |
| C <sub>5</sub> H <sub>8</sub>   | 3-Methyl-1,2-butadiene      | 598-25-4         | 68              | 9.56                 | 0.002             |
| C <sub>5</sub> H <sub>8</sub>   | 1,3-Pentadiene              | 504-60-9         | 68              | 9.86                 | 0.010             |
| C <sub>5</sub> H <sub>8</sub>   | (Z)-1,3-Pentadiene          | 1574-41-0        | 68              | 9.91                 | 0.005             |
| C <sub>6</sub> H <sub>12</sub>  | 1-Hexene                    | 592-41-6         | 84              | 12.84                | 0.028             |
| C <sub>6</sub> H <sub>10</sub>  | 4-Methyl-1,3-pentadiene     | 926-56-7         | 82              | 13.77                | 0.001             |
| C <sub>6</sub> H <sub>10</sub>  | (Z)-3-Methyl-1,3-pentadiene | 2787-45-3        | 82              | 14.17                | 0.002             |
| C <sub>6</sub> H <sub>10</sub>  | (E,E)-2,4-Hexadiene         | 5194-51-4        | 82              | 14.50                | 0.001             |
| C <sub>7</sub> H <sub>14</sub>  | 1-Heptene                   | 592-76-7         | 98              | 17.10                | 0.048             |
| C <sub>8</sub> H <sub>16</sub>  | 3,4-Dimethyl-2-hexene       | 2213-37-8        | 112             | 20.95                | 0.045             |
| C <sub>8</sub> H <sub>16</sub>  | (E)-3-Octene                | 14919-01-8       | 112             | 21.28                | 0.049             |
| C <sub>8</sub> H <sub>16</sub>  | (Z)-4-Octene                | 7642-15-1        | 112             | 21.42                | 0.053             |

|                                                              |                                            |            |     |        |        |
|--------------------------------------------------------------|--------------------------------------------|------------|-----|--------|--------|
| C <sub>8</sub> H <sub>16</sub>                               | (Z)-3-Octene                               | 14850-22-7 | 112 | 21.48  | 0.053  |
| C <sub>8</sub> H <sub>16</sub>                               | 1-Octene                                   | 111-66-0   | 112 | 21.63  | 0.027  |
| C <sub>9</sub> H <sub>18</sub>                               | 1-Nonene                                   | 124-11-8   | 126 | 25.48  | 0.059  |
| C <sub>10</sub> H <sub>20</sub>                              | 1-Decene                                   | 872-05-9   | 140 | 29.16  | 0.177  |
| C <sub>11</sub> H <sub>22</sub>                              | 1-Undecene                                 | 821-95-4   | 154 | 32.41  | 0.030  |
| C <sub>12</sub> H <sub>24</sub>                              | 1-Dodecene                                 | 112-41-4   | 168 | 36.17  | 0.020  |
| C <sub>13</sub> H <sub>26</sub>                              | 1-Tridecene                                | 2437-56-1  | 182 | 41.42  | 0.053  |
| C <sub>14</sub> H <sub>28</sub>                              | 1-Tetradecene                              | 1120-36-1  | 196 | 49.56  | 0.046  |
| C <sub>15</sub> H <sub>30</sub>                              | 1-Pentadecene                              | 13360-61-7 | 210 | 62.65  | 0.167  |
| C <sub>16</sub> H <sub>32</sub>                              | 1-Hexadecene                               | 629-73-2   | 224 | 83.71  | 0.006  |
| C <sub>17</sub> H <sub>34</sub>                              | 1-Heptadecene                              | 6765-39-5  | 238 | 118.64 | 0.011  |
| <b>Cyclic hydrocarbons</b>                                   |                                            |            |     |        |        |
| <i>Cycloalkanes (naphthenes) and cycloalkenes</i>            |                                            |            |     |        |        |
| C <sub>6</sub> H <sub>10</sub>                               | 4-Methylcyclopentene                       | 1759-81-5  | 82  | 13.27  | 0.007  |
| C <sub>8</sub> H <sub>14</sub>                               | 3-Propylcyclopentene                       | 34067-75-9 | 110 | 22.03  | 0.022  |
| <i>Arenes</i>                                                |                                            |            |     |        |        |
| C <sub>6</sub> H <sub>6</sub>                                | Benzene                                    | 71-43-2    | 78  | 13.54  | 0.016  |
| C <sub>7</sub> H <sub>8</sub>                                | Toluene                                    | 108-88-3   | 92  | 18.24  | 0.044  |
| C <sub>8</sub> H <sub>10</sub>                               | Ethylbenzene                               | 100-41-4   | 106 | 22.40  | 0.040  |
| C <sub>8</sub> H <sub>10</sub>                               | p-Xylene                                   | 106-42-3   | 106 | 22.68  | 0.060  |
| C <sub>8</sub> H <sub>8</sub>                                | Styrene                                    | 100-42-5   | 104 | 23.25  | 0.003  |
| C <sub>9</sub> H <sub>12</sub>                               | Propylbenzene                              | 103-65-1   | 120 | 26.31  | 0.017  |
| C <sub>10</sub> H <sub>14</sub>                              | o-Cymene                                   | 527-84-4   | 134 | 29.26  | 0.037  |
| C <sub>10</sub> H <sub>14</sub>                              | Butylbenzene                               | 104-51-8   | 134 | 30.21  | 0.038  |
| C <sub>11</sub> H <sub>16</sub>                              | Pentylbenzene                              | 538-68-1   | 148 | 33.71  | 0.027  |
| C <sub>12</sub> H <sub>18</sub>                              | Hexylbenzene                               | 1077-16-3  | 162 | 37.92  | 0.041  |
| C <sub>13</sub> H <sub>20</sub>                              | Heptylbenzene                              | 1078-71-3  | 176 | 44.26  | 0.009  |
| C <sub>14</sub> H <sub>22</sub>                              | Octylbenzene                               | 2189-60-8  | 190 | 54.36  | 0.010  |
| C <sub>15</sub> H <sub>24</sub>                              | Nonylbenzene                               | 1081-77-2  | 204 | 70.46  | 0.011  |
| <i>Polycyclic aromatic hydrocarbons (PAH)</i>                |                                            |            |     |        |        |
| C <sub>10</sub> H <sub>8</sub>                               | Naphthalene                                | 91-20-3    | 128 | 33.57  | 0.001  |
| C <sub>11</sub> H <sub>10</sub>                              | 2-Methylnaphthalene                        | 91-57-6    | 142 | 38.12  | 0.001  |
| C <sub>11</sub> H <sub>10</sub>                              | 1-Methylnaphthalene                        | 90-12-0    | 142 | 38.57  | <0.001 |
| <b>Oxygenated hydrocarbons</b>                               |                                            |            |     |        |        |
| <i>Alcohols, ethers and esters</i>                           |                                            |            |     |        |        |
| CH <sub>4</sub> O                                            | Methyl Alcohol                             | 67-56-1    | 32  | 4.93   | 0.060  |
| C <sub>2</sub> H <sub>6</sub> O                              | Ethanol                                    | 64-17-5    | 46  | 6.64   | 0.032  |
| C <sub>4</sub> H <sub>10</sub> O                             | 1-Butanol                                  | 71-36-3    | 74  | 13.47  | 0.035  |
| C <sub>5</sub> H <sub>8</sub> O <sub>2</sub>                 | Methyl methacrylate                        | 80-62-6    | 100 | 15.34  | 0.029  |
| C <sub>4</sub> H <sub>4</sub> O <sub>2</sub>                 | γ-Crotonolactone                           | 497-23-4   | 84  | 20.47  | 0.029  |
| C <sub>6</sub> H <sub>6</sub> O                              | Phenol                                     | 108-95-2   | 94  | 25.48  | 0.037  |
| C <sub>5</sub> H <sub>8</sub> O <sub>2</sub>                 | δ-Valerolactone                            | 542-28-9   | 100 | 26.96  | 0.016  |
| C <sub>6</sub> H <sub>10</sub> O <sub>2</sub>                | γ-Caprolactone                             | 695-06-7   | 114 | 30.56  | 0.039  |
| C <sub>5</sub> H <sub>8</sub> Cl <sub>2</sub> O <sub>2</sub> | Butanoic acid, 3,4-dichloro-, methyl ester | 819-93-2   | 170 | 31.17  | 0.001  |

|                                                |                                            |            |     |        |       |
|------------------------------------------------|--------------------------------------------|------------|-----|--------|-------|
| C <sub>9</sub> H <sub>16</sub> O <sub>4</sub>  | Acetoxyacetic acid, 3-methylbut-2-yl ester | x          | 188 | 33.87  | 0.050 |
| C <sub>8</sub> H <sub>10</sub> O <sub>2</sub>  | 2-Phenoxyethanol                           | 122-99-6   | 138 | 34.06  | 0.030 |
| C <sub>8</sub> H <sub>14</sub> O <sub>2</sub>  | γ-Octalactone                              | 104-50-7   | 142 | 35.62  | 0.023 |
| C <sub>9</sub> H <sub>16</sub> O <sub>2</sub>  | γ-Nonalactone                              | 104-61-0   | 156 | 40.90  | 0.052 |
| C <sub>12</sub> H <sub>22</sub> O <sub>2</sub> | γ-Dodecalactone                            | 2305-05-7  | 198 | 83.63  | 0.007 |
| C <sub>14</sub> H <sub>18</sub> O <sub>4</sub> | Dipropyl phthalate                         | 131-16-8   | 250 | 124.98 | 0.092 |
| <i>Aldehydes</i>                               |                                            |            |     |        |       |
| C <sub>2</sub> H <sub>4</sub> O                | Acetaldehyde                               | 75-07-0    | 44  | 5.41   | 0.064 |
| C <sub>3</sub> H <sub>4</sub> O                | 2-Propenal                                 | 107-02-8   | 56  | 7.59   | 0.018 |
| C <sub>3</sub> H <sub>6</sub> O                | n-Propanal                                 | 123-38-6   | 58  | 7.81   | 0.021 |
| C <sub>3</sub> H <sub>4</sub> O <sub>2</sub>   | 2-Oxopropanal                              | 78-98-8    | 72  | 7.96   | 0.016 |
| C <sub>5</sub> H <sub>10</sub> O               | n-Pentanal                                 | 110-62-3   | 86  | 15.40  | 0.036 |
| C <sub>5</sub> H <sub>4</sub> O <sub>2</sub>   | 2-Furaldehyde                              | 98-01-1    | 96  | 18.00  | 0.018 |
| C <sub>5</sub> H <sub>4</sub> O <sub>2</sub>   | 3-Furaldehyde                              | 498-60-2   | 96  | 18.83  | 0.168 |
| C <sub>6</sub> H <sub>12</sub> O               | n-Hexanal                                  | 66-25-1    | 100 | 20.00  | 0.090 |
| C <sub>6</sub> H <sub>6</sub> O <sub>2</sub>   | 5-Methyl-2-furancarboxaldehyde             | 620-02-0   | 110 | 24.05  | 0.043 |
| C <sub>7</sub> H <sub>14</sub> O               | n-Heptanal                                 | 111-71-7   | 114 | 24.30  | 0.084 |
| C <sub>7</sub> H <sub>6</sub> O                | Benzaldehyde                               | 100-52-7   | 106 | 24.98  | 0.039 |
| C <sub>8</sub> H <sub>16</sub> O               | n-Octanal                                  | 124-13-0   | 128 | 28.23  | 0.100 |
| C <sub>9</sub> H <sub>18</sub> O               | n-Nonanal                                  | 124-19-6   | 142 | 31.84  | 0.161 |
| C <sub>6</sub> H <sub>6</sub> O <sub>3</sub>   | 5-Hydroxymethylfurfural                    | 67-47-0    | 126 | 32.84  | 0.193 |
| C <sub>10</sub> H <sub>20</sub> O              | n-Decanal                                  | 112-31-2   | 156 | 35.39  | 0.129 |
| C <sub>11</sub> H <sub>22</sub> O              | n-Undecanal                                | 112-44-7   | 170 | 40.32  | 0.052 |
| C <sub>12</sub> H <sub>24</sub> O              | n-Dodecanal                                | 112-54-9   | 184 | 47.93  | 0.053 |
| C <sub>13</sub> H <sub>26</sub> O              | n-Tridecanal                               | 10486-19-8 | 198 | 60.22  | 0.095 |
| C <sub>14</sub> H <sub>28</sub> O              | n-Tetradecanal                             | 124-25-4   | 212 | 79.97  | 0.009 |
| C <sub>15</sub> H <sub>30</sub> O              | n-Pentadecanal                             | 2765-11-9  | 226 | 112.19 | 0.014 |
| <i>Ketones</i>                                 |                                            |            |     |        |       |
| C <sub>3</sub> H <sub>6</sub> O                | 2-Propanone                                | 67-64-1    | 58  | 7.88   | 0.021 |
| C <sub>5</sub> H <sub>10</sub> O               | 2-Pentanone                                | 107-87-9   | 86  | 14.42  | 0.013 |
| C <sub>5</sub> H <sub>8</sub> O                | Cyclopentanone                             | 120-92-3   | 84  | 17.70  | 0.001 |
| C <sub>6</sub> H <sub>12</sub> O               | 2-Hexanone                                 | 591-78-6   | 100 | 19.70  | 0.013 |
| C <sub>5</sub> H <sub>4</sub> O <sub>3</sub>   | 3-Methyl-2,5-furandione                    | 616-02-4   | 112 | 23.23  | 0.062 |
| C <sub>7</sub> H <sub>14</sub> O               | 2-Heptanone                                | 110-43-0   | 114 | 23.96  | 0.051 |
| C <sub>8</sub> H <sub>16</sub> O               | 2-Methyl-4-heptanone                       | 626-33-5   | 128 | 26.50  | 0.016 |
| C <sub>8</sub> H <sub>16</sub> O               | 6-Methyl-2-heptanone                       | 928-68-7   | 128 | 27.08  | 0.025 |
| C <sub>8</sub> H <sub>14</sub> O               | 6-Methyl-5-hepten-2-one                    | 110-93-0   | 126 | 27.26  | 0.027 |
| C <sub>8</sub> H <sub>16</sub> O               | 2-Octanone                                 | 111-13-7   | 128 | 27.89  | 0.014 |
| C <sub>9</sub> H <sub>18</sub> O               | 2-Nonanone                                 | 821-55-6   | 142 | 31.49  | 0.055 |
| C <sub>10</sub> H <sub>20</sub> O              | 2-Decanone                                 | 693-54-9   | 156 | 34.97  | 0.052 |
| C <sub>11</sub> H <sub>22</sub> O              | 2-Undecanone                               | 112-12-9   | 170 | 39.70  | 0.040 |
| C <sub>8</sub> H <sub>4</sub> O <sub>3</sub>   | Phthalic anhydride                         | 85-44-9    | 148 | 36.80  | 0.058 |

|                                                |                              |            |     |        |       |
|------------------------------------------------|------------------------------|------------|-----|--------|-------|
| C <sub>12</sub> H <sub>24</sub> O              | 2-Dodecanone                 | 6175-49-1  | 184 | 47.00  | 0.004 |
| C <sub>13</sub> H <sub>26</sub> O              | 2-Tridecanone                | 593-08-8   | 198 | 58.54  | 0.053 |
| C <sub>14</sub> H <sub>28</sub> O              | 2-Tetradecanone              | 2345-27-9  | 212 | 77.04  | 0.009 |
| C <sub>15</sub> H <sub>30</sub> O              | 2-Pentadecanone              | 2345-28-0  | 226 | 107.53 | 0.042 |
| <i>Carboxylic acids</i>                        |                              |            |     |        |       |
| C <sub>2</sub> H <sub>4</sub> O <sub>2</sub>   | Acetic acid                  | 64-19-7    | 60  | 11.86  | 0.601 |
| C <sub>3</sub> H <sub>6</sub> O <sub>2</sub>   | n-Propanoic acid             | 79-09-4    | 74  | 16.79  | 0.003 |
| C <sub>4</sub> H <sub>8</sub> O <sub>2</sub>   | n-Butanoic acid              | 107-92-6   | 88  | 20.17  | 0.161 |
| C <sub>5</sub> H <sub>10</sub> O <sub>2</sub>  | 3-Methylbutanoic acid        | 503-74-2   | 102 | 23.56  | 0.054 |
| C <sub>5</sub> H <sub>10</sub> O <sub>2</sub>  | n-Pentanoic acid             | 109-52-4   | 102 | 24.48  | 0.042 |
| C <sub>6</sub> H <sub>12</sub> O <sub>2</sub>  | n-Hexanoic acid              | 142-62-1   | 116 | 27.88  | 0.095 |
| C <sub>7</sub> H <sub>14</sub> O <sub>2</sub>  | n-Heptanoic acid             | 111-14-8   | 130 | 31.67  | 0.013 |
| C <sub>8</sub> H <sub>16</sub> O <sub>2</sub>  | n-Octanoic acid              | 124-07-2   | 144 | 34.67  | 0.084 |
| C <sub>9</sub> H <sub>18</sub> O <sub>2</sub>  | n-Nonanoic acid              | 112-05-0   | 158 | 39.30  | 0.234 |
| C <sub>10</sub> H <sub>20</sub> O <sub>2</sub> | n-Decanoic acid              | 334-48-5   | 172 | 46.06  | 0.249 |
| C <sub>11</sub> H <sub>22</sub> O <sub>2</sub> | n-Undecanoic acid            | 112-37-8   | 186 | 57.75  | 0.026 |
| C <sub>11</sub> H <sub>14</sub> O <sub>3</sub> | 2,4,6-Trimethylmandelic acid | 20797-56-2 | 194 | 65.01  | 0.001 |
| C <sub>12</sub> H <sub>24</sub> O <sub>2</sub> | n-Dodecanoic acid            | 143-07-7   | 200 | 73.89  | 0.575 |
| C <sub>13</sub> H <sub>26</sub> O <sub>2</sub> | n-Tridecanoic acid           | 638-53-9   | 214 | 104.38 | 0.016 |
| <b>Heterocyclic compounds</b>                  |                              |            |     |        |       |
| <i>Dioxanes</i>                                |                              |            |     |        |       |
| C <sub>4</sub> H <sub>8</sub> O <sub>2</sub>   | 1,4-Dioxane                  | 123-91-1   | 88  | 14.29  | 0.001 |
| C <sub>4</sub> H <sub>8</sub> O <sub>2</sub>   | 1,3-Dioxane                  | 505-22-6   | 88  | 17.59  | 0.031 |
| <i>Furans</i>                                  |                              |            |     |        |       |
| C <sub>5</sub> H <sub>6</sub> O                | 2-Methylfuran                | 534-22-5   | 82  | 11.12  | 0.001 |
| C <sub>6</sub> H <sub>8</sub> O                | 2-Ethylfuran                 | 3208-16-0  | 96  | 17.34  | 0.003 |
| C <sub>7</sub> H <sub>10</sub> O               | 2-Propylfuran                | 4229-91-8  | 110 | 18.60  | 0.020 |
| C <sub>5</sub> H <sub>6</sub> O <sub>2</sub>   | 2-Methoxyfuran               | 25414-22-6 | 98  | 19.10  | 0.055 |
| C <sub>8</sub> H <sub>12</sub> O               | 2-Butylfuran                 | 4466-24-4  | 124 | 23.68  | 0.001 |
| C <sub>9</sub> H <sub>14</sub> O               | 2-Pentylfuran                | 3777-69-3  | 138 | 27.63  | 0.024 |
| C <sub>10</sub> H <sub>16</sub> O              | 2-Hexylfuran                 | 3777-70-6  | 152 | 31.26  | 0.011 |
| C <sub>11</sub> H <sub>18</sub> O              | 2-Heptylfuran                | 3777-71-7  | 166 | 34.72  | 0.001 |
| C <sub>12</sub> H <sub>20</sub> O              | 2-Octylfuran                 | 4179-38-8  | 180 | 39.32  | 0.002 |
| C <sub>13</sub> H <sub>22</sub> O              | 2-Nonylfuran                 | x          | 194 | 46.31  | 0.001 |
| C <sub>15</sub> H <sub>26</sub> O              | 2-Undecylfuran               | 4082-56-8  | 222 | 73.77  | 0.002 |
| <b>Sulfonated compounds</b>                    |                              |            |     |        |       |
| H <sub>2</sub> S                               | Hydrogen sulfide             | 7783-06-4  | 34  | 3.21   | 0.003 |
| COS                                            | Carbonyl sulfide             | 463-58-1   | 60  | 3.83   | 0.001 |
| O <sub>2</sub> S                               | Sulfur dioxide               | 7446-09-5  | 64  | 5.01   | 0.140 |
| CS <sub>2</sub>                                | Carbon disulfide             | 75-15-0    | 76  | 6.06   | 0.010 |
| C <sub>2</sub> H <sub>6</sub> S <sub>2</sub>   | Dimethyl disulfide           | 624-92-0   | 94  | 16.29  | 0.001 |
| C <sub>7</sub> H <sub>10</sub> S               | 2-Propylthiophene            | 1551-27-5  | 126 | 26.45  | 0.001 |
| C <sub>9</sub> H <sub>14</sub> S               | 2-Pentylthiophene            | 4861-58-9  | 154 | 33.41  | 0.001 |
| C <sub>10</sub> H <sub>16</sub> S              | 2-Hexylthiophene             | 18794-77-9 | 168 | 36.64  | 0.001 |

| Nitrogenated compounds                         |                            |           |     |       |        |
|------------------------------------------------|----------------------------|-----------|-----|-------|--------|
| N <sub>2</sub>                                 | Nitrogen                   | 7727-37-9 | 28  | 1.87  | 0.176  |
| C <sub>5</sub> H <sub>9</sub> N                | 1-Isocyanobutane           | 2769-64-4 | 83  | 6.79  | 0.004  |
| CH <sub>3</sub> NO                             | Formamide                  | 75-12-7   | 45  | 8.39  | 0.004  |
| C <sub>2</sub> H <sub>5</sub> NO               | Acetamide                  | 60-35-5   | 59  | 15.17 | 0.047  |
| C <sub>5</sub> H <sub>5</sub> N                | Pyridine                   | 110-86-1  | 79  | 15.82 | 0.002  |
| C <sub>7</sub> H <sub>15</sub> N               | 1,2-Dimethylpiperidine     | 671-36-3  | 113 | 23.07 | 0.002  |
| C <sub>6</sub> H <sub>8</sub> N <sub>2</sub> O | 2-Methoxy-6-methylpyrazine | 2882-21-5 | 124 | 28.13 | 0.159  |
| C <sub>4</sub> H <sub>5</sub> NO <sub>2</sub>  | Succinimide                | 123-56-8  | 99  | 28.94 | 0.048  |
| C <sub>5</sub> H <sub>9</sub> NO               | 1-Methyl-2-pyrrolidone     | 872-50-4  | 99  | 30.88 | 0.001  |
| Inorganic compounds                            |                            |           |     |       |        |
| <i>Oxides</i>                                  |                            |           |     |       |        |
| CO <sub>2</sub>                                | Carbon dioxide             | 124-38-9  | 44  | 2.15  | 24.294 |
| H <sub>2</sub> O                               | Water                      | 7732-18-5 | 18  | 3.26  | 67.879 |

Note: <sup>1</sup>CAS – unique numerical identifier of chemical compounds included in the register Chemical Abstracts Service (<https://www.cas.org>); <sup>2</sup>MW – nominal mass; <sup>3</sup>RT – retention time; <sup>4</sup>A – normalized area (the area ratio of the individual gas mixture components to the summ of the areas of all the components in the chromatogram).
