# Supplementary material for: Fluid Components in Cordierite from the Rocks of Epidote-Amphibole Facies of the Muzkol Metamorphic Complex, Tajikistan: Pyrolysis-Free GC-MS Data
Source: MDPI journal article supplement (doi:10.3390/min13030323), 2023-02-24
Supplement: s1 [file s1]

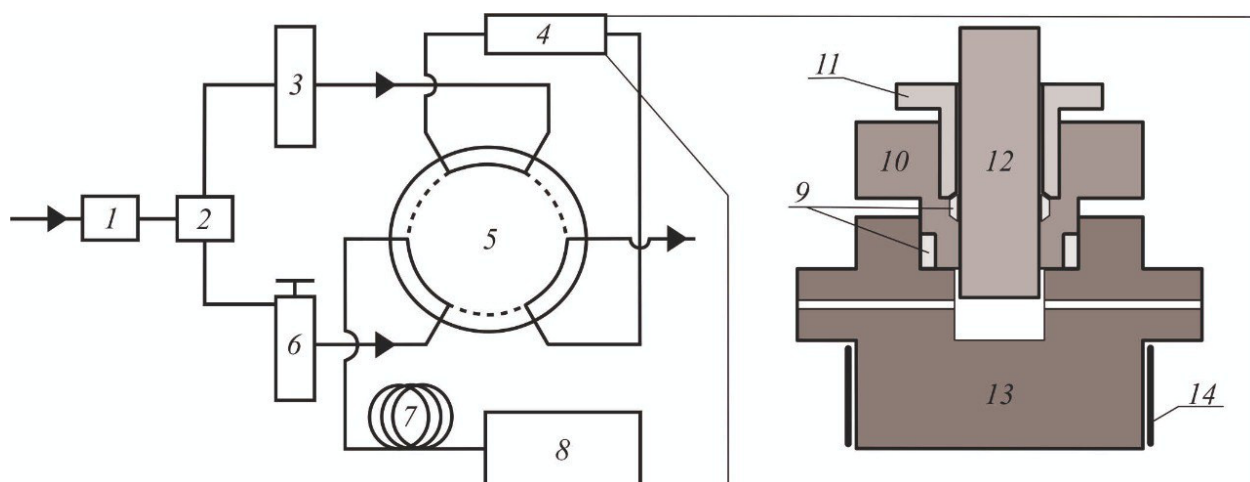

**Figure S1.** Schematic diagram of the pneumatic circuit with the main nodes of the used gas chromatograph-mass spectrometer: 1, filter; 2, tee; 3, gas flow regulator; 4, cell for sample destruction; 5–6, port 2-way crane; 6, SSL injector; 7, analytical column; 8, mass selective detector. On the insert, there is a simplified section diagram of 4 nodes: 9, fluoroplastic seals; 10, persistent nut; 11, pressure nut; 12, shockproof stock; 13, housing with a recess for the sample and a through gas path; 14, furnace heater.
