# Supplementary material for: Fluid Components in Cordierite from the Rocks of Epidote-Amphibole Facies of the Muzkol Metamorphic Complex, Tajikistan: Pyrolysis-Free GC-MS Data
Source: MDPI journal article supplement (doi:10.3390/min13030323), 2023-02-24
Supplement: s1 [file s1]

**Table S2.** Results of the GC-MS analysis of the gas phase extracted during shock destruction of cordierite № 2 (Muzkol complex, Pamir, Tajikistan, species diversity of 169 components).

| Formula                         | Name                        | <sup>1</sup> CAS | <sup>2</sup> MW | Cordierite №2        |                   |
|---------------------------------|-----------------------------|------------------|-----------------|----------------------|-------------------|
|                                 |                             |                  |                 | <sup>3</sup> RT, min | <sup>4</sup> A, % |
| Aliphatic hydrocarbons          |                             |                  |                 |                      |                   |
| Paraffins                       |                             |                  |                 |                      |                   |
| C <sub>2</sub> H <sub>6</sub>   | Ethane                      | 74-84-0          | 30              | 2.76                 | 0.007             |
| C <sub>3</sub> H <sub>8</sub>   | n-Propane                   | 74-98-6          | 44              | 4.93                 | 0.024             |
| C <sub>4</sub> H <sub>10</sub>  | Isobutane                   | 75-28-5          | 58              | 6.71                 | 0.098             |
| C <sub>4</sub> H <sub>10</sub>  | n-Butane                    | 106-97-8         | 58              | 7.03                 | 0.028             |
| C <sub>5</sub> H <sub>12</sub>  | n-Pentane                   | 109-66-0         | 72              | 9.49                 | 0.032             |
| C <sub>6</sub> H <sub>14</sub>  | n-Hexane                    | 110-54-3         | 86              | 13.07                | 0.052             |
| C <sub>7</sub> H <sub>16</sub>  | n-Heptane                   | 142-82-5         | 100             | 17.59                | 0.092             |
| C <sub>8</sub> H <sub>16</sub>  | 3-Methyleneheptane          | 1632-16-2        | 112             | 21.10                | 0.186             |
| C <sub>8</sub> H <sub>18</sub>  | n-Octane                    | 111-65-9         | 114             | 21.82                | 0.067             |
| C <sub>9</sub> H <sub>20</sub>  | n-Nonane                    | 111-84-2         | 128             | 25.81                | 0.112             |
| C <sub>10</sub> H <sub>22</sub> | n-Decane                    | 124-18-5         | 142             | 29.44                | 0.117             |
| C <sub>11</sub> H <sub>24</sub> | n-Undecane                  | 1120-21-4        | 156             | 32.66                | 0.083             |
| C <sub>12</sub> H <sub>26</sub> | n-Dodecane                  | 112-40-3         | 170             | 36.57                | 0.041             |
| C <sub>13</sub> H <sub>28</sub> | n-Tridecane                 | 629-50-5         | 184             | 41.93                | 0.072             |
| C <sub>14</sub> H <sub>30</sub> | n-Tetradecane               | 629-59-4         | 198             | 50.44                | 0.118             |
| C <sub>15</sub> H <sub>32</sub> | 5-Methyltetradecane         | 25117-32-2       | 212             | 53.92                | 0.382             |
| C <sub>15</sub> H <sub>32</sub> | n-Pentadecane               | 629-62-9         | 212             | 64.06                | 0.221             |
| C <sub>16</sub> H <sub>34</sub> | n-Hexadecane                | 544-76-3         | 226             | 85.83                | 0.078             |
| C <sub>17</sub> H <sub>36</sub> | n-Heptadecane               | 629-78-7         | 240             | 121.13               | 0.054             |
| Olefins                         |                             |                  |                 |                      |                   |
| C <sub>2</sub> H <sub>4</sub>   | Ethylene                    | 74-85-1          | 28              | 2.56                 | 0.022             |
| C <sub>3</sub> H <sub>6</sub>   | 1-Propene                   | 115-07-1         | 42              | 4.48                 | 0.045             |
| C <sub>4</sub> H <sub>8</sub>   | 2-Methyl-1-propene          | 115-11-7         | 56              | 6.46                 | 0.192             |
| C <sub>5</sub> H <sub>8</sub>   | 1,4-Pentadiene              | 591-93-5         | 68              | 8.71                 | 0.007             |
| C <sub>5</sub> H <sub>10</sub>  | 1-Pentene                   | 109-67-1         | 70              | 9.11                 | 0.056             |
| C <sub>5</sub> H <sub>8</sub>   | 2-Methyl-1,3-butadiene      | 78-79-5          | 68              | 9.33                 | 0.043             |
| C <sub>5</sub> H <sub>8</sub>   | (E)-1,3-Pentadiene          | 2004-70-8        | 68              | 9.34                 | 0.005             |
| C <sub>5</sub> H <sub>8</sub>   | 3-Methyl-1,2-butadiene      | 598-25-4         | 68              | 9.58                 | 0.195             |
| C <sub>5</sub> H <sub>8</sub>   | 1,3-Pentadiene              | 504-60-9         | 68              | 9.88                 | 0.009             |
| C <sub>5</sub> H <sub>8</sub>   | (Z)-1,3-Pentadiene          | 1574-41-0        | 68              | 9.96                 | 0.017             |
| C <sub>6</sub> H <sub>12</sub>  | 1-Hexene                    | 592-41-6         | 84              | 12.86                | 0.025             |
| C <sub>6</sub> H <sub>10</sub>  | 4-Methyl-1,3-pentadiene     | 926-56-7         | 82              | 13.86                | 0.005             |
| C <sub>6</sub> H <sub>10</sub>  | (Z)-3-Methyl-1,3-pentadiene | 2787-45-3        | 82              | 14.25                | 0.004             |
| C <sub>6</sub> H <sub>10</sub>  | (E,E)-2,4-Hexadiene         | 5194-51-4        | 82              | 14.50                | 0.002             |
| C <sub>7</sub> H <sub>14</sub>  | 1-Heptene                   | 592-76-7         | 98              | 17.14                | 0.071             |
| C <sub>8</sub> H <sub>16</sub>  | 3,4-Dimethyl-2-hexene       | 2213-37-8        | 112             | 20.93                | 0.058             |
| C <sub>8</sub> H <sub>16</sub>  | (E)-3-Octene                | 14919-01-8       | 112             | 21.30                | 0.084             |
| C <sub>8</sub> H <sub>16</sub>  | (Z)-4-Octene                | 7642-15-1        | 112             | 21.42                | 0.087             |

|                                                   |                      |            |     |        |       |
|---------------------------------------------------|----------------------|------------|-----|--------|-------|
| C <sub>8</sub> H <sub>16</sub>                    | (Z)-3-Octene         | 14850-22-7 | 112 | 21.52  | 0.147 |
| C <sub>8</sub> H <sub>16</sub>                    | 1-Octene             | 111-66-0   | 112 | 21.65  | 0.066 |
| C <sub>9</sub> H <sub>18</sub>                    | 1-Nonene             | 124-11-8   | 126 | 25.50  | 0.024 |
| C <sub>10</sub> H <sub>20</sub>                   | 1-Decene             | 872-05-9   | 140 | 29.21  | 0.253 |
| C <sub>11</sub> H <sub>22</sub>                   | 1-Undecene           | 821-95-4   | 154 | 32.44  | 0.061 |
| C <sub>12</sub> H <sub>24</sub>                   | 1-Dodecene           | 112-41-4   | 168 | 36.24  | 0.023 |
| C <sub>13</sub> H <sub>26</sub>                   | 1-Tridecene          | 2437-56-1  | 182 | 41.47  | 0.094 |
| C <sub>14</sub> H <sub>28</sub>                   | 1-Tetradecene        | 1120-36-1  | 196 | 49.63  | 0.109 |
| C <sub>15</sub> H <sub>30</sub>                   | 1-Pentadecene        | 13360-61-7 | 210 | 62.71  | 0.324 |
| C <sub>16</sub> H <sub>32</sub>                   | 1-Hexadecene         | 629-73-2   | 224 | 83.68  | 0.011 |
| C <sub>17</sub> H <sub>34</sub>                   | 1-Heptadecene        | 6765-39-5  | 238 | 118.62 | 0.059 |
| <b>Cyclic hydrocarbons</b>                        |                      |            |     |        |       |
| <i>Cycloalkanes (naphthenes) and cycloalkenes</i> |                      |            |     |        |       |
| C <sub>6</sub> H <sub>10</sub>                    | 4-Methylcyclopentene | 1759-81-5  | 82  | 13.31  | 0.053 |
| C <sub>8</sub> H <sub>14</sub>                    | 3-Propylcyclopentene | 34067-75-9 | 110 | 22.08  | 0.114 |
| <i>Arenes</i>                                     |                      |            |     |        |       |
| C <sub>6</sub> H <sub>6</sub>                     | Benzene              | 71-43-2    | 78  | 13.57  | 0.047 |
| C <sub>7</sub> H <sub>8</sub>                     | Toluene              | 108-88-3   | 92  | 18.25  | 0.145 |
| C <sub>8</sub> H <sub>10</sub>                    | Ethylbenzene         | 100-41-4   | 106 | 22.43  | 0.172 |
| C <sub>8</sub> H <sub>10</sub>                    | p-Xylene             | 106-42-3   | 106 | 22.71  | 0.223 |
| C <sub>8</sub> H <sub>8</sub>                     | Styrene              | 100-42-5   | 104 | 23.26  | 0.184 |
| C <sub>9</sub> H <sub>12</sub>                    | Propylbenzene        | 103-65-1   | 120 | 26.36  | 0.072 |
| C <sub>10</sub> H <sub>14</sub>                   | o-Cymene             | 527-84-4   | 134 | 29.31  | 0.131 |
| C <sub>10</sub> H <sub>14</sub>                   | Butylbenzene         | 104-51-8   | 134 | 30.24  | 0.153 |
| C <sub>11</sub> H <sub>16</sub>                   | Pentylbenzene        | 538-68-1   | 148 | 33.69  | 0.109 |
| C <sub>12</sub> H <sub>18</sub>                   | Hexylbenzene         | 1077-16-3  | 162 | 37.94  | 0.180 |
| C <sub>13</sub> H <sub>20</sub>                   | Heptylbenzene        | 1078-71-3  | 176 | 44.28  | 0.044 |
| C <sub>14</sub> H <sub>22</sub>                   | Octylbenzene         | 2189-60-8  | 190 | 54.39  | 0.059 |
| C <sub>15</sub> H <sub>24</sub>                   | Nonylbenzene         | 1081-77-2  | 204 | 70.64  | 0.062 |
| <i>Polycyclic aromatic hydrocarbons (PAH)</i>     |                      |            |     |        |       |
| C <sub>10</sub> H <sub>8</sub>                    | Naphthalene          | 91-20-3    | 128 | 33.57  | 0.006 |
| C <sub>11</sub> H <sub>10</sub>                   | 2-Methylnaphthalene  | 91-57-6    | 142 | 38.13  | 0.003 |
| C <sub>11</sub> H <sub>10</sub>                   | 1-Methylnaphthalene  | 90-12-0    | 142 | 38.57  | 0.003 |
| <b>Oxygenated hydrocarbons</b>                    |                      |            |     |        |       |
| <i>Alcohols, ethers and esters</i>                |                      |            |     |        |       |
| CH <sub>4</sub> O                                 | Methyl Alcohol       | 67-56-1    | 32  | 4.96   | 0.064 |
| C <sub>2</sub> H <sub>6</sub> O                   | Ethanol              | 64-17-5    | 46  | 6.66   | 0.089 |
| C <sub>4</sub> H <sub>10</sub> O                  | 1-Butanol            | 71-36-3    | 74  | 13.51  | 0.087 |
| C <sub>6</sub> H <sub>6</sub> O                   | Phenol               | 108-95-2   | 94  | 25.53  | 0.042 |
| C <sub>8</sub> H <sub>10</sub> O <sub>2</sub>     | 2-Phenoxyethanol     | 122-99-6   | 138 | 34.12  | 0.057 |
| C <sub>5</sub> H <sub>8</sub> O <sub>2</sub>      | Methyl methacrylate  | 80-62-6    | 100 | 15.40  | 0.139 |
| C <sub>4</sub> H <sub>4</sub> O <sub>2</sub>      | γ-Crotonolactone     | 497-23-4   | 84  | 20.53  | 0.135 |
| C <sub>5</sub> H <sub>8</sub> O <sub>2</sub>      | δ-Valerolactone      | 542-28-9   | 100 | 27.01  | 0.078 |
| C <sub>6</sub> H <sub>10</sub> O <sub>2</sub>     | γ-Caprolactone       | 695-06-7   | 114 | 30.59  | 0.068 |

|                                                              |                                            |            |     |        |       |
|--------------------------------------------------------------|--------------------------------------------|------------|-----|--------|-------|
| C <sub>5</sub> H <sub>8</sub> Cl <sub>2</sub> O <sub>2</sub> | Butanoic acid, 3,4-dichloro-, methyl ester | 819-93-2   | 170 | 31.17  | 0.134 |
| C <sub>9</sub> H <sub>16</sub> O <sub>4</sub>                | Acetoxyacetic acid, 3-methylbut-2-yl ester | x          | 188 | 33.91  | 0.066 |
| C <sub>8</sub> H <sub>14</sub> O <sub>2</sub>                | γ-Octalactone                              | 104-50-7   | 142 | 35.62  | 0.276 |
| C <sub>9</sub> H <sub>16</sub> O <sub>2</sub>                | γ-Nonalactone                              | 104-61-0   | 156 | 40.93  | 0.091 |
| C <sub>12</sub> H <sub>22</sub> O <sub>2</sub>               | γ-Dodecalactone                            | 2305-05-7  | 198 | 83.68  | 0.193 |
| C <sub>14</sub> H <sub>18</sub> O <sub>4</sub>               | Dipropyl phthalate                         | 131-16-8   | 250 | 125.03 | 0.197 |
| <i>Aldehydes</i>                                             |                                            |            |     |        |       |
| C <sub>2</sub> H <sub>4</sub> O                              | Acetaldehyde                               | 75-07-0    | 44  | 5.43   | 0.122 |
| C <sub>3</sub> H <sub>4</sub> O                              | 2-Propenal                                 | 107-02-8   | 56  | 7.61   | 0.006 |
| C <sub>3</sub> H <sub>6</sub> O                              | n-Propanal                                 | 123-38-6   | 58  | 7.81   | 0.041 |
| C <sub>3</sub> H <sub>4</sub> O <sub>2</sub>                 | 2-Oxopropanal                              | 78-98-8    | 72  | 7.99   | 0.004 |
| C <sub>5</sub> H <sub>10</sub> O                             | n-Pentanal                                 | 110-62-3   | 86  | 15.49  | 0.067 |
| C <sub>5</sub> H <sub>4</sub> O <sub>2</sub>                 | 2-Furaldehyde                              | 98-01-1    | 96  | 18.05  | 0.030 |
| C <sub>5</sub> H <sub>4</sub> O <sub>2</sub>                 | 3-Furaldehyde                              | 498-60-2   | 96  | 18.87  | 0.297 |
| C <sub>6</sub> H <sub>12</sub> O                             | n-Hexanal                                  | 66-25-1    | 100 | 20.02  | 0.170 |
| C <sub>6</sub> H <sub>6</sub> O <sub>2</sub>                 | 5-Methyl-2-furancarboxaldehyde             | 620-02-0   | 110 | 24.05  | 0.039 |
| C <sub>7</sub> H <sub>14</sub> O                             | n-Heptanal                                 | 111-71-7   | 114 | 24.30  | 0.117 |
| C <sub>7</sub> H <sub>6</sub> O                              | Benzaldehyde                               | 100-52-7   | 106 | 24.98  | 0.056 |
| C <sub>8</sub> H <sub>16</sub> O                             | n-Octanal                                  | 124-13-0   | 128 | 28.23  | 0.149 |
| C <sub>9</sub> H <sub>18</sub> O                             | n-Nonanal                                  | 124-19-6   | 142 | 31.86  | 0.306 |
| C <sub>6</sub> H <sub>6</sub> O <sub>3</sub>                 | 5-Hydroxymethylfurfural                    | 67-47-0    | 126 | 32.87  | 0.378 |
| C <sub>10</sub> H <sub>20</sub> O                            | n-Decanal                                  | 112-31-2   | 156 | 35.40  | 0.248 |
| C <sub>11</sub> H <sub>22</sub> O                            | n-Undecanal                                | 112-44-7   | 170 | 40.37  | 0.094 |
| C <sub>12</sub> H <sub>24</sub> O                            | n-Dodecanal                                | 112-54-9   | 184 | 48.04  | 0.101 |
| C <sub>13</sub> H <sub>26</sub> O                            | n-Tridecanal                               | 10486-19-8 | 198 | 60.28  | 0.187 |
| C <sub>14</sub> H <sub>28</sub> O                            | n-Tetradecanal                             | 124-25-4   | 212 | 79.98  | 0.016 |
| C <sub>15</sub> H <sub>30</sub> O                            | n-Pentadecanal                             | 2765-11-9  | 226 | 112.19 | 0.029 |
| <i>Ketones</i>                                               |                                            |            |     |        |       |
| C <sub>3</sub> H <sub>6</sub> O                              | 2-Propanone                                | 67-64-1    | 58  | 7.91   | 0.035 |
| C <sub>5</sub> H <sub>10</sub> O                             | 2-Pentanone                                | 107-87-9   | 86  | 14.44  | 0.024 |
| C <sub>5</sub> H <sub>8</sub> O                              | Cyclopentanone                             | 120-92-3   | 84  | 17.75  | 0.002 |
| C <sub>6</sub> H <sub>12</sub> O                             | 2-Hexanone                                 | 591-78-6   | 100 | 19.70  | 0.024 |
| C <sub>5</sub> H <sub>4</sub> O <sub>3</sub>                 | 3-Methyl-2,5-furandione                    | 616-02-4   | 112 | 23.23  | 0.106 |
| C <sub>7</sub> H <sub>14</sub> O                             | 2-Heptanone                                | 110-43-0   | 114 | 23.96  | 0.083 |
| C <sub>8</sub> H <sub>16</sub> O                             | 2-Methyl-4-heptanone                       | 626-33-5   | 128 | 26.56  | 0.025 |
| C <sub>8</sub> H <sub>16</sub> O                             | 6-Methyl-2-heptanone                       | 928-68-7   | 128 | 27.11  | 0.028 |
| C <sub>8</sub> H <sub>14</sub> O                             | 6-Methyl-5-hepten-2-one                    | 110-93-0   | 126 | 27.36  | 0.061 |
| C <sub>8</sub> H <sub>16</sub> O                             | 2-Octanone                                 | 111-13-7   | 128 | 27.86  | 0.023 |
| C <sub>9</sub> H <sub>18</sub> O                             | 2-Nonanone                                 | 821-55-6   | 142 | 31.51  | 0.109 |
| C <sub>10</sub> H <sub>20</sub> O                            | 2-Decanone                                 | 693-54-9   | 156 | 34.97  | 0.099 |
| C <sub>11</sub> H <sub>22</sub> O                            | 2-Undecanone                               | 112-12-9   | 170 | 39.77  | 0.076 |
| C <sub>8</sub> H <sub>4</sub> O <sub>3</sub>                 | Phthalic anhydride                         | 85-44-9    | 148 | 36.82  | 0.105 |
| C <sub>12</sub> H <sub>24</sub> O                            | 2-Dodecanone                               | 6175-49-1  | 184 | 47.08  | 0.008 |

|                                                |                              |            |     |        |       |
|------------------------------------------------|------------------------------|------------|-----|--------|-------|
| C <sub>13</sub> H <sub>26</sub> O              | 2-Tridecanone                | 593-08-8   | 198 | 58.55  | 0.102 |
| C <sub>14</sub> H <sub>28</sub> O              | 2-Tetradecanone              | 2345-27-9  | 212 | 77.04  | 0.018 |
| C <sub>15</sub> H <sub>30</sub> O              | 2-Pentadecanone              | 2345-28-0  | 226 | 107.54 | 0.083 |
| <i>Carboxylic acids</i>                        |                              |            |     |        |       |
| C <sub>2</sub> H <sub>4</sub> O <sub>2</sub>   | Acetic acid                  | 64-19-7    | 60  | 12.02  | 0.181 |
| C <sub>3</sub> H <sub>6</sub> O <sub>2</sub>   | n-Propanoic acid             | 79-09-4    | 74  | 16.80  | 0.004 |
| C <sub>4</sub> H <sub>8</sub> O <sub>2</sub>   | n-Butanoic acid              | 107-92-6   | 88  | 20.60  | 0.031 |
| C <sub>5</sub> H <sub>10</sub> O <sub>2</sub>  | 3-Methylbutanoic acid        | 503-74-2   | 102 | 23.66  | 0.004 |
| C <sub>5</sub> H <sub>10</sub> O <sub>2</sub>  | n-Pentanoic acid             | 109-52-4   | 102 | 24.65  | 0.015 |
| C <sub>6</sub> H <sub>12</sub> O <sub>2</sub>  | n-Hexanoic acid              | 142-62-1   | 116 | 28.04  | 0.047 |
| C <sub>7</sub> H <sub>14</sub> O <sub>2</sub>  | n-Heptanoic acid             | 111-14-8   | 130 | 31.59  | 0.016 |
| C <sub>8</sub> H <sub>16</sub> O <sub>2</sub>  | n-Octanoic acid              | 124-07-2   | 144 | 34.82  | 0.033 |
| C <sub>9</sub> H <sub>18</sub> O <sub>2</sub>  | n-Nonanoic acid              | 112-05-0   | 158 | 39.45  | 0.039 |
| C <sub>10</sub> H <sub>20</sub> O <sub>2</sub> | n-Decanoic acid              | 334-48-5   | 172 | 46.38  | 0.077 |
| C <sub>11</sub> H <sub>22</sub> O <sub>2</sub> | n-Undecanoic acid            | 112-37-8   | 186 | 57.79  | 0.018 |
| C <sub>11</sub> H <sub>14</sub> O <sub>3</sub> | 2,4,6-Trimethylmandelic acid | 20797-56-2 | 194 | 65.05  | 0.002 |
| C <sub>12</sub> H <sub>24</sub> O <sub>2</sub> | n-Dodecanoic acid            | 143-07-7   | 200 | 73.15  | 0.110 |
| C <sub>13</sub> H <sub>26</sub> O <sub>2</sub> | n-Tridecanoic acid           | 638-53-9   | 214 | 106.15 | 0.023 |
| <b>Heterocyclic compounds</b>                  |                              |            |     |        |       |
| <i>Dioxanes</i>                                |                              |            |     |        |       |
| C <sub>4</sub> H <sub>8</sub> O <sub>2</sub>   | 1,4-Dioxane                  | 123-91-1   | 88  | 14.34  | 0.001 |
| C <sub>4</sub> H <sub>8</sub> O <sub>2</sub>   | 1,3-Dioxane                  | 505-22-6   | 88  | 17.69  | 0.109 |
| <i>Furans</i>                                  |                              |            |     |        |       |
| C <sub>5</sub> H <sub>6</sub> O                | 2-Methylfuran                | 534-22-5   | 82  | 11.16  | 0.004 |
| C <sub>6</sub> H <sub>8</sub> O                | 2-Ethylfuran                 | 3208-16-0  | 96  | 17.37  | 0.017 |
| C <sub>7</sub> H <sub>10</sub> O               | 2-Propylfuran                | 4229-91-8  | 110 | 18.68  | 0.082 |
| C <sub>5</sub> H <sub>6</sub> O <sub>2</sub>   | 2-Methoxyfuran               | 25414-22-6 | 98  | 19.18  | 0.025 |
| C <sub>8</sub> H <sub>12</sub> O               | 2-Butylfuran                 | 4466-24-4  | 124 | 23.71  | 0.011 |
| C <sub>9</sub> H <sub>14</sub> O               | 2-Pentylfuran                | 3777-69-3  | 138 | 27.66  | 0.109 |
| C <sub>10</sub> H <sub>16</sub> O              | 2-Hexylfuran                 | 3777-70-6  | 152 | 31.32  | 0.064 |
| C <sub>11</sub> H <sub>18</sub> O              | 2-Heptylfuran                | 3777-71-7  | 166 | 34.79  | 0.005 |
| C <sub>12</sub> H <sub>20</sub> O              | 2-Octylfuran                 | 4179-38-8  | 180 | 39.37  | 0.009 |
| C <sub>13</sub> H <sub>22</sub> O              | 2-Nonylfuran                 | x          | 194 | 46.36  | 0.007 |
| C <sub>15</sub> H <sub>26</sub> O              | 2-Undecylfuran               | 4082-56-8  | 222 | 73.82  | 0.006 |
| <b>Sulfonated compounds</b>                    |                              |            |     |        |       |
| H <sub>2</sub> S                               | Hydrogen sulfide             | 7783-06-4  | 34  | 3.06   | 0.001 |
| COS                                            | Carbonyl sulfide             | 463-58-1   | 60  | 3.86   | 0.002 |
| O <sub>2</sub> S                               | Sulfur dioxide               | 7446-09-5  | 64  | 4.71   | 0.268 |
| CS <sub>2</sub>                                | Carbon disulfide             | 75-15-0    | 76  | 7.49   | 0.010 |
| C <sub>2</sub> H <sub>6</sub> S <sub>2</sub>   | Dimethyl disulfide           | 624-92-0   | 94  | 16.30  | 0.001 |
| C <sub>7</sub> H <sub>10</sub> S               | 2-Propylthiophene            | 1551-27-5  | 126 | 26.45  | 0.003 |
| C <sub>9</sub> H <sub>14</sub> S               | 2-Pentylthiophene            | 4861-58-9  | 154 | 33.39  | 0.003 |
| C <sub>10</sub> H <sub>16</sub> S              | 2-Hexylthiophene             | 18794-77-9 | 168 | 36.67  | 0.001 |
| <b>Nitrogenated compounds</b>                  |                              |            |     |        |       |
| N <sub>2</sub>                                 | Nitrogen                     | 7727-37-9  | 28  | 1.98   | 0.200 |

|                                                |                            |           |     |       |        |
|------------------------------------------------|----------------------------|-----------|-----|-------|--------|
| C <sub>5</sub> H <sub>9</sub> N                | 1-Isocyanobutane           | 2769-64-4 | 83  | 6.79  | 0.007  |
| CH <sub>3</sub> NO                             | Formamide                  | 75-12-7   | 45  | 8.41  | 0.003  |
| C <sub>2</sub> H <sub>5</sub> NO               | Acetamide                  | 60-35-5   | 59  | 15.25 | 0.054  |
| C <sub>5</sub> H <sub>5</sub> N                | Pyridine                   | 110-86-1  | 79  | 15.89 | 0.004  |
| C <sub>7</sub> H <sub>15</sub> N               | 1,2-Dimethylpiperidine     | 671-36-3  | 113 | 23.07 | 0.003  |
| C <sub>6</sub> H <sub>8</sub> N <sub>2</sub> O | 2-Methoxy-6-methylpyrazine | 2882-21-5 | 124 | 28.16 | 0.208  |
| C <sub>4</sub> H <sub>5</sub> NO <sub>2</sub>  | Succinimide                | 123-56-8  | 99  | 28.96 | 0.069  |
| C <sub>5</sub> H <sub>9</sub> NO               | 1-Methyl-2-pyrrolidone     | 872-50-4  | 99  | 30.88 | 0.001  |
| <b>Inorganic compounds</b>                     |                            |           |     |       |        |
| <i>Oxides</i>                                  |                            |           |     |       |        |
| CO <sub>2</sub>                                | Carbon dioxide             | 124-38-9  | 44  | 2.20  | 30.120 |
| H <sub>2</sub> O                               | Water                      | 7732-18-5 | 18  | 3.41  | 57.058 |

Note: <sup>1</sup>CAS – unique numerical identifier of chemical compounds included in the register Chemical Abstracts Service (<https://www.cas.org>); <sup>2</sup>MW – nominal mass; <sup>3</sup>RT – retention time; <sup>4</sup>A – normalized area (the area ratio of the individual gas mixture components to the sum of the areas of all the components in the chromatogram).
