# Supplementary material for: Fluid Components in Cordierite from the Rocks of Epidote-Amphibole Facies of the Muzkol Metamorphic Complex, Tajikistan: Pyrolysis-Free GC-MS Data
Source: MDPI journal article supplement (doi:10.3390/min13030323), 2023-02-24
Supplement: s1 [file s1]

**Table S4.** Results of the GC-MS analysis of the gas phase extracted during shock destruction of cordierite № 4 (Muzkol complex, Pamir, Tajikistan, species diversity of 170 components).

| Formula                         | Name                        | <sup>1</sup> CAS/(NIST) | <sup>2</sup> MW | Cordierite №4        |                   |
|---------------------------------|-----------------------------|-------------------------|-----------------|----------------------|-------------------|
|                                 |                             |                         |                 | <sup>3</sup> RT, min | <sup>4</sup> A, % |
| Aliphatic hydrocarbons          |                             |                         |                 |                      |                   |
| Paraffins                       |                             |                         |                 |                      |                   |
| CH <sub>4</sub>                 | Methane                     | 74-82-8                 | 32              | 1.92                 | 0.004             |
| C <sub>2</sub> H <sub>6</sub>   | Ethane                      | 74-84-0                 | 30              | 2.80                 | 0.039             |
| C <sub>3</sub> H <sub>8</sub>   | n-Propane                   | 74-98-6                 | 44              | 4.65                 | 0.020             |
| C <sub>4</sub> H <sub>10</sub>  | Isobutane                   | 75-28-5                 | 58              | 6.71                 | 0.014             |
| C <sub>4</sub> H <sub>10</sub>  | n-Butane                    | 106-97-8                | 58              | 7.03                 | 0.023             |
| C <sub>5</sub> H <sub>12</sub>  | n-Pentane                   | 109-66-0                | 72              | 9.49                 | 0.018             |
| C <sub>6</sub> H <sub>14</sub>  | n-Hexane                    | 110-54-3                | 86              | 13.07                | 0.036             |
| C <sub>7</sub> H <sub>16</sub>  | n-Heptane                   | 142-82-5                | 100             | 17.57                | 0.095             |
| C <sub>8</sub> H <sub>16</sub>  | 3-Methyleneheptane          | 1632-16-2               | 112             | 21.13                | 0.250             |
| C <sub>8</sub> H <sub>18</sub>  | n-Octane                    | 111-65-9                | 114             | 21.83                | 0.068             |
| C <sub>9</sub> H <sub>20</sub>  | n-Nonane                    | 111-84-2                | 128             | 25.83                | 0.131             |
| C <sub>10</sub> H <sub>22</sub> | n-Decane                    | 124-18-5                | 142             | 29.46                | 0.001             |
| C <sub>11</sub> H <sub>24</sub> | n-Undecane                  | 1120-21-4               | 156             | 32.62                | 0.092             |
| C <sub>12</sub> H <sub>26</sub> | n-Dodecane                  | 112-40-3                | 170             | 36.57                | 0.057             |
| C <sub>13</sub> H <sub>28</sub> | n-Tridecane                 | 629-50-5                | 184             | 41.98                | 0.087             |
| C <sub>14</sub> H <sub>30</sub> | n-Tetradecane               | 629-59-4                | 198             | 50.39                | 0.129             |
| C <sub>15</sub> H <sub>32</sub> | 5-Methyltetradecane         | 25117-32-2              | 212             | 54.06                | 0.447             |
| C <sub>15</sub> H <sub>32</sub> | n-Pentadecane               | 629-62-9                | 212             | 63.91                | 0.216             |
| C <sub>16</sub> H <sub>34</sub> | n-Hexadecane                | 544-76-3                | 226             | 85.58                | 0.053             |
| C <sub>17</sub> H <sub>36</sub> | n-Heptadecane               | 629-78-7                | 240             | 121.22               | 0.051             |
| Olefins                         |                             |                         |                 |                      |                   |
| C <sub>2</sub> H <sub>4</sub>   | Ethylene                    | 74-85-1                 | 28              | 2.51                 | 0.021             |
| C <sub>3</sub> H <sub>6</sub>   | 1-Propene                   | 115-07-1                | 42              | 4.48                 | 0.441             |
| C <sub>4</sub> H <sub>8</sub>   | 2-Methyl-1-propene          | 115-11-7                | 56              | 6.46                 | 0.135             |
| C <sub>5</sub> H <sub>8</sub>   | 1,4-Pentadiene              | 591-93-5                | 68              | 8.69                 | 0.001             |
| C <sub>5</sub> H <sub>10</sub>  | 1-Pentene                   | 109-67-1                | 70              | 9.11                 | 0.025             |
| C <sub>5</sub> H <sub>8</sub>   | (E)-1,3-Pentadiene          | 2004-70-8               | 68              | 9.33                 | 0.147             |
| C <sub>5</sub> H <sub>8</sub>   | 3-Methyl-1,2-butadiene      | 598-25-4                | 68              | 9.58                 | 0.007             |
| C <sub>5</sub> H <sub>8</sub>   | 1,3-Pentadiene              | 504-60-9                | 68              | 9.86                 | 0.003             |
| C <sub>5</sub> H <sub>8</sub>   | (Z)-1,3-Pentadiene          | 1574-41-0               | 68              | 9.91                 | 0.009             |
| C <sub>6</sub> H <sub>12</sub>  | 1-Hexene                    | 592-41-6                | 84              | 12.86                | 0.017             |
| C <sub>6</sub> H <sub>10</sub>  | 4-Methyl-1,3-pentadiene     | 926-56-7                | 82              | 13.94                | 0.007             |
| C <sub>6</sub> H <sub>10</sub>  | (Z)-3-Methyl-1,3-pentadiene | 2787-45-3               | 82              | 14.27                | 0.009             |
| C <sub>6</sub> H <sub>10</sub>  | (E,E)-2,4-Hexadiene         | 5194-51-4               | 82              | 14.55                | 0.003             |
| C <sub>7</sub> H <sub>14</sub>  | 1-Heptene                   | 592-76-7                | 98              | 17.14                | 0.074             |
| C <sub>8</sub> H <sub>16</sub>  | 3,4-Dimethyl-2-hexene       | 2213-37-8               | 112             | 20.97                | 0.084             |
| C <sub>8</sub> H <sub>16</sub>  | (E)-3-Octene                | 14919-01-8              | 112             | 21.25                | 0.129             |
| C <sub>8</sub> H <sub>16</sub>  | (Z)-4-Octene                | 7642-15-1               | 112             | 21.50                | 0.105             |

|                                                   |                           |            |     |        |       |
|---------------------------------------------------|---------------------------|------------|-----|--------|-------|
| C <sub>8</sub> H <sub>16</sub>                    | (Z)-3-Octene              | 14850-22-7 | 112 | 21.53  | 0.155 |
| C <sub>8</sub> H <sub>16</sub>                    | 1-Octene                  | 111-66-0   | 112 | 21.65  | 0.070 |
| C <sub>9</sub> H <sub>18</sub>                    | 1-Nonene                  | 124-11-8   | 126 | 25.45  | 0.072 |
| C <sub>10</sub> H <sub>20</sub>                   | 1-Decene                  | 872-05-9   | 140 | 29.19  | 0.262 |
| C <sub>11</sub> H <sub>22</sub>                   | 1-Undecene                | 821-95-4   | 154 | 32.44  | 0.072 |
| C <sub>12</sub> H <sub>24</sub>                   | 1-Dodecene                | 112-41-4   | 168 | 36.24  | 0.052 |
| C <sub>13</sub> H <sub>26</sub>                   | 1-Tridecene               | 2437-56-1  | 182 | 41.48  | 0.123 |
| C <sub>14</sub> H <sub>28</sub>                   | 1-Tetradecene             | 1120-36-1  | 196 | 49.61  | 0.090 |
| C <sub>15</sub> H <sub>30</sub>                   | 1-Pentadecene             | 13360-61-7 | 210 | 62.71  | 0.334 |
| C <sub>16</sub> H <sub>32</sub>                   | 1-Hexadecene              | 629-73-2   | 224 | 83.80  | 0.010 |
| C <sub>17</sub> H <sub>34</sub>                   | 1-Heptadecene             | 6765-39-5  | 238 | 118.67 | 0.023 |
| <b>Cyclic hydrocarbons</b>                        |                           |            |     |        |       |
| <i>Cycloalkanes (naphthenes) and cycloalkenes</i> |                           |            |     |        |       |
| C <sub>6</sub> H <sub>10</sub>                    | 4-Methylcyclopentene      | 1759-81-5  | 82  | 13.31  | 0.020 |
| C <sub>8</sub> H <sub>14</sub>                    | 3-Propylcyclopentene      | 34067-75-9 | 110 | 22.07  | 0.053 |
| <i>Arenes</i>                                     |                           |            |     |        |       |
| C <sub>6</sub> H <sub>6</sub>                     | Benzene                   | 71-43-2    | 78  | 13.52  | 0.022 |
| C <sub>7</sub> H <sub>8</sub>                     | Toluene                   | 108-88-3   | 92  | 18.27  | 0.087 |
| C <sub>8</sub> H <sub>10</sub>                    | Ethylbenzene              | 100-41-4   | 106 | 22.45  | 0.080 |
| C <sub>8</sub> H <sub>10</sub>                    | p-Xylene                  | 106-42-3   | 106 | 22.71  | 0.075 |
| C <sub>8</sub> H <sub>8</sub>                     | Styrene                   | 100-42-5   | 104 | 23.28  | 0.027 |
| C <sub>9</sub> H <sub>12</sub>                    | Propylbenzene             | 103-65-1   | 120 | 26.38  | 0.025 |
| C <sub>10</sub> H <sub>14</sub>                   | o-Cymene                  | 527-84-4   | 134 | 29.29  | 0.019 |
| C <sub>10</sub> H <sub>14</sub>                   | Butylbenzene              | 104-51-8   | 134 | 30.23  | 0.066 |
| C <sub>11</sub> H <sub>16</sub>                   | Pentylbenzene             | 538-68-1   | 148 | 33.72  | 0.055 |
| C <sub>12</sub> H <sub>18</sub>                   | Hexylbenzene              | 1077-16-3  | 162 | 37.92  | 0.070 |
| C <sub>13</sub> H <sub>20</sub>                   | Heptylbenzene             | 1078-71-3  | 176 | 44.28  | 0.026 |
| C <sub>14</sub> H <sub>22</sub>                   | Octylbenzene              | 2189-60-8  | 190 | 53.92  | 0.017 |
| C <sub>15</sub> H <sub>24</sub>                   | Nonylbenzene              | 1081-77-2  | 204 | 70.42  | 0.023 |
| C <sub>18</sub> H <sub>28</sub>                   | 1-Propyl-1-nonenylbenzene | 54986-39-9 | 244 | 112.57 | 0.031 |
| <i>Polycyclic aromatic hydrocarbons (PAH)</i>     |                           |            |     |        |       |
| C <sub>10</sub> H <sub>8</sub>                    | Naphthalene               | 91-20-3    | 128 | 33.57  | 0.007 |
| C <sub>11</sub> H <sub>10</sub>                   | 2-Methylnaphthalene       | 91-57-6    | 142 | 38.15  | 0.002 |
| C <sub>11</sub> H <sub>10</sub>                   | 1-Methylnaphthalene       | 90-12-0    | 142 | 38.68  | 0.002 |
| <b>Oxygenated hydrocarbons</b>                    |                           |            |     |        |       |
| <i>Alcohols, ethers and esters</i>                |                           |            |     |        |       |
| CH <sub>4</sub> O                                 | Methyl Alcohol            | 67-56-1    | 32  | 4.96   | 0.028 |
| C <sub>2</sub> H <sub>6</sub> O                   | Ethanol                   | 64-17-5    | 46  | 6.51   | 0.065 |
| C <sub>4</sub> H <sub>10</sub> O                  | 1-Butanol                 | 71-36-3    | 74  | 13.52  | 0.110 |
| C <sub>6</sub> H <sub>6</sub> O                   | Phenol                    | 108-95-2   | 94  | 25.53  | 0.012 |
| C <sub>8</sub> H <sub>10</sub> O <sub>2</sub>     | 2-Phenoxyethanol          | 122-99-6   | 138 | 34.12  | 0.063 |
| C <sub>5</sub> H <sub>8</sub> O <sub>2</sub>      | Methyl methacrylate       | 80-62-6    | 100 | 15.47  | 0.048 |
| C <sub>4</sub> H <sub>4</sub> O <sub>2</sub>      | γ-Crotonolactone          | 497-23-4   | 84  | 20.52  | 0.074 |
| C <sub>5</sub> H <sub>8</sub> O <sub>2</sub>      | δ-Valerolactone           | 542-28-9   | 100 | 26.99  | 0.036 |

|                                                              |                                            |            |     |        |       |
|--------------------------------------------------------------|--------------------------------------------|------------|-----|--------|-------|
| C <sub>8</sub> H <sub>18</sub> O                             | 2-Ethyl-1-hexanol                          | 104-76-7   | 130 | 29.19  | 0.442 |
| C <sub>8</sub> H <sub>18</sub> O                             | 2-Ethyl-4-methylpentan-1-ol                | 106-67-2   | 130 | 29.38  | 0.330 |
| C <sub>4</sub> H <sub>6</sub> O <sub>3</sub>                 | 2(3H)-Furanone, dihydro-4-hydroxy-         | 5469-16-9  | 102 | 30.39  | 0.018 |
| C <sub>6</sub> H <sub>10</sub> O <sub>2</sub>                | γ-Caprolactone                             | 695-06-7   | 114 | 30.59  | 0.048 |
| C <sub>5</sub> H <sub>8</sub> Cl <sub>2</sub> O <sub>2</sub> | Butanoic acid, 3,4-dichloro-, methyl ester | 819-93-2   | 170 | 31.21  | 0.016 |
| C <sub>9</sub> H <sub>16</sub> O <sub>4</sub>                | Acetoxyacetic acid, 3-methylbut-2-yl ester | x          | 188 | 33.91  | 0.139 |
| C <sub>8</sub> H <sub>14</sub> O <sub>2</sub>                | γ-Octalactone                              | 104-50-7   | 142 | 35.65  | 0.058 |
| C <sub>9</sub> H <sub>16</sub> O <sub>2</sub>                | γ-Nonalactone                              | 104-61-0   | 156 | 40.98  | 0.112 |
| C <sub>12</sub> H <sub>22</sub> O <sub>2</sub>               | γ-Dodecalactone                            | 2305-05-7  | 198 | 83.86  | 0.013 |
| C <sub>14</sub> H <sub>18</sub> O <sub>4</sub>               | Dipropyl phthalate                         | 131-16-8   | 250 | 125.16 | 0.271 |
| <i>Aldehydes</i>                                             |                                            |            |     |        |       |
| C <sub>2</sub> H <sub>4</sub> O                              | Acetaldehyde                               | 75-07-0    | 44  | 5.45   | 0.152 |
| C <sub>3</sub> H <sub>4</sub> O                              | 2-Propenal                                 | 107-02-8   | 56  | 7.61   | 0.010 |
| C <sub>3</sub> H <sub>6</sub> O                              | n-Propanal                                 | 123-38-6   | 58  | 7.83   | 0.050 |
| C <sub>3</sub> H <sub>4</sub> O <sub>2</sub>                 | 2-Oxopropanal                              | 78-98-8    | 72  | 8.16   | 0.173 |
| C <sub>5</sub> H <sub>10</sub> O                             | 3-Methylbutanal                            | 590-86-3   | 86  | 14.52  | 0.002 |
| C <sub>5</sub> H <sub>10</sub> O                             | n-Pentanal                                 | 110-62-3   | 86  | 15.54  | 0.101 |
| C <sub>5</sub> H <sub>4</sub> O <sub>2</sub>                 | 2-Furaldehyde                              | 98-01-1    | 96  | 18.05  | 0.026 |
| C <sub>5</sub> H <sub>4</sub> O <sub>2</sub>                 | 3-Furaldehyde                              | 498-60-2   | 96  | 18.90  | 0.856 |
| C <sub>6</sub> H <sub>12</sub> O                             | n-Hexanal                                  | 66-25-1    | 100 | 20.05  | 1.204 |
| C <sub>6</sub> H <sub>6</sub> O <sub>2</sub>                 | 5-Methyl-2-furancarboxaldehyde             | 620-02-0   | 110 | 24.10  | 0.075 |
| C <sub>7</sub> H <sub>14</sub> O                             | n-Heptanal                                 | 111-71-7   | 114 | 24.31  | 0.075 |
| C <sub>7</sub> H <sub>6</sub> O                              | Benzaldehyde                               | 100-52-7   | 106 | 24.00  | 0.085 |
| C <sub>8</sub> H <sub>16</sub> O                             | n-Octanal                                  | 124-13-0   | 128 | 28.28  | 0.232 |
| C <sub>9</sub> H <sub>18</sub> O                             | n-Nonanal                                  | 124-19-6   | 142 | 31.87  | 0.326 |
| C <sub>6</sub> H <sub>6</sub> O <sub>3</sub>                 | 5-Hydroxymethylfurfural                    | 67-47-0    | 126 | 32.89  | 0.445 |
| C <sub>10</sub> H <sub>20</sub> O                            | n-Decanal                                  | 112-31-2   | 156 | 35.44  | 0.280 |
| C <sub>11</sub> H <sub>22</sub> O                            | n-Undecanal                                | 112-44-7   | 170 | 40.38  | 0.117 |
| C <sub>12</sub> H <sub>24</sub> O                            | n-Dodecanal                                | 112-54-9   | 184 | 48.08  | 0.109 |
| C <sub>13</sub> H <sub>26</sub> O                            | n-Tridecanal                               | 10486-19-8 | 198 | 60.27  | 0.232 |
| C <sub>14</sub> H <sub>28</sub> O                            | n-Tetradecanal                             | 124-25-4   | 212 | 80.10  | 0.021 |
| C <sub>15</sub> H <sub>30</sub> O                            | n-Pentadecanal                             | 2765-11-9  | 226 | 112.57 | 0.039 |
| <i>Ketones</i>                                               |                                            |            |     |        |       |
| C <sub>3</sub> H <sub>6</sub> O                              | 2-Propanone                                | 67-64-1    | 58  | 7.94   | 0.045 |
| C <sub>5</sub> H <sub>10</sub> O                             | 2-Pentanone                                | 107-87-9   | 86  | 14.45  | 0.036 |
| C <sub>5</sub> H <sub>8</sub> O                              | Cyclopentanone                             | 120-92-3   | 84  | 17.79  | 0.002 |
| C <sub>6</sub> H <sub>12</sub> O                             | 2-Hexanone                                 | 591-78-6   | 100 | 19.73  | 0.028 |
| C <sub>5</sub> H <sub>4</sub> O <sub>3</sub>                 | 3-Methyl-2,5-furandione                    | 616-02-4   | 112 | 23.25  | 0.152 |
| C <sub>7</sub> H <sub>14</sub> O                             | 2-Heptanone                                | 110-43-0   | 114 | 23.98  | 0.058 |
| C <sub>8</sub> H <sub>16</sub> O                             | 2-Methyl-4-heptanone                       | 626-33-5   | 128 | 26.54  | 0.025 |

|                                                |                              |            |     |        |       |
|------------------------------------------------|------------------------------|------------|-----|--------|-------|
| C <sub>8</sub> H <sub>16</sub> O               | 6-Methyl-2-heptanone         | 928-68-7   | 128 | 27.14  | 0.052 |
| C <sub>8</sub> H <sub>14</sub> O               | 6-Methyl-5-hepten-2-one      | 110-93-0   | 126 | 27.39  | 0.088 |
| C <sub>8</sub> H <sub>16</sub> O               | 2-Octanone                   | 111-13-7   | 128 | 27.79  | 0.003 |
| C <sub>9</sub> H <sub>18</sub> O               | 2-Nonanone                   | 821-55-6   | 142 | 31.51  | 0.887 |
| C <sub>10</sub> H <sub>20</sub> O              | 2-Decanone                   | 693-54-9   | 156 | 34.97  | 0.115 |
| C <sub>11</sub> H <sub>22</sub> O              | 2-Undecanone                 | 112-12-9   | 170 | 39.78  | 0.077 |
| C <sub>8</sub> H <sub>4</sub> O <sub>3</sub>   | Phthalic anhydride           | 85-44-9    | 148 | 36.87  | 0.072 |
| C <sub>12</sub> H <sub>24</sub> O              | 2-Dodecanone                 | 6175-49-1  | 184 | 47.08  | 0.010 |
| C <sub>13</sub> H <sub>26</sub> O              | 2-Tridecanone                | 593-08-8   | 198 | 58.45  | 0.130 |
| C <sub>14</sub> H <sub>28</sub> O              | 2-Tetradecanone              | 2345-27-9  | 212 | 77.04  | 0.021 |
| C <sub>15</sub> H <sub>30</sub> O              | 2-Pentadecanone              | 2345-28-0  | 226 | 107.54 | 0.091 |
| <i>Carboxylic acids</i>                        |                              |            |     |        |       |
| C <sub>2</sub> H <sub>4</sub> O <sub>2</sub>   | Acetic acid                  | 64-19-7    | 60  | 12.07  | 0.263 |
| C <sub>3</sub> H <sub>6</sub> O <sub>2</sub>   | n-Propanoic acid             | 79-09-4    | 74  | 16.84  | 0.005 |
| C <sub>4</sub> H <sub>8</sub> O <sub>2</sub>   | n-Butanoic acid              | 107-92-6   | 88  | 20.57  | 0.022 |
| C <sub>5</sub> H <sub>10</sub> O <sub>2</sub>  | 3-Methylbutanoic acid        | 503-74-2   | 102 | 23.53  | 0.005 |
| C <sub>5</sub> H <sub>10</sub> O <sub>2</sub>  | n-Pentanoic acid             | 109-52-4   | 102 | 24.48  | 0.024 |
| C <sub>6</sub> H <sub>12</sub> O <sub>2</sub>  | n-Hexanoic acid              | 142-62-1   | 116 | 27.86  | 0.082 |
| C <sub>7</sub> H <sub>14</sub> O <sub>2</sub>  | n-Heptanoic acid             | 111-14-8   | 130 | 31.34  | 0.029 |
| C <sub>8</sub> H <sub>16</sub> O <sub>2</sub>  | n-Octanoic acid              | 124-07-2   | 144 | 34.65  | 0.043 |
| C <sub>9</sub> H <sub>18</sub> O <sub>2</sub>  | n-Nonanoic acid              | 112-05-0   | 158 | 39.08  | 0.057 |
| C <sub>10</sub> H <sub>20</sub> O <sub>2</sub> | n-Decanoic acid              | 334-48-5   | 172 | 45.83  | 0.129 |
| C <sub>11</sub> H <sub>22</sub> O <sub>2</sub> | n-Undecanoic acid            | 112-37-8   | 186 | 57.17  | 0.019 |
| C <sub>11</sub> H <sub>14</sub> O <sub>3</sub> | 2,4,6-Trimethylmandelic acid | 20797-56-2 | 194 | 65.06  | 0.004 |
| C <sub>12</sub> H <sub>24</sub> O <sub>2</sub> | n-Dodecanoic acid            | 143-07-7   | 200 | 74.07  | 0.134 |
| C <sub>13</sub> H <sub>26</sub> O <sub>2</sub> | n-Tridecanoic acid           | 638-53-9   | 214 | 104.95 | 0.028 |
| <b>Heterocyclic compounds</b>                  |                              |            |     |        |       |
| <i>Dioxanes</i>                                |                              |            |     |        |       |
| C <sub>4</sub> H <sub>8</sub> O <sub>2</sub>   | 1,4-Dioxane                  | 123-91-1   | 88  | 14.42  | 0.001 |
| C <sub>4</sub> H <sub>8</sub> O <sub>2</sub>   | 1,3-Dioxane                  | 505-22-6   | 88  | 17.69  | 0.066 |
| <i>Furans</i>                                  |                              |            |     |        |       |
| C <sub>5</sub> H <sub>6</sub> O                | 2-Methylfuran                | 534-22-5   | 82  | 11.16  | 0.008 |
| C <sub>6</sub> H <sub>8</sub> O                | 2-Ethylfuran                 | 3208-16-0  | 96  | 17.35  | 0.005 |
| C <sub>7</sub> H <sub>10</sub> O               | 2-Propylfuran                | 4229-91-8  | 110 | 18.70  | 0.062 |
| C <sub>5</sub> H <sub>6</sub> O <sub>2</sub>   | 2-Methoxyfuran               | 25414-22-6 | 98  | 19.15  | 0.067 |
| C <sub>8</sub> H <sub>12</sub> O               | 2-Butylfuran                 | 4466-24-4  | 124 | 23.73  | 0.004 |
| C <sub>9</sub> H <sub>14</sub> O               | 2-Pentylfuran                | 3777-69-3  | 138 | 27.64  | 0.046 |
| C <sub>10</sub> H <sub>16</sub> O              | 2-Hexylfuran                 | 3777-70-6  | 152 | 31.29  | 0.024 |
| C <sub>11</sub> H <sub>18</sub> O              | 2-Heptylfuran                | 3777-71-7  | 166 | 34.77  | 0.002 |
| C <sub>12</sub> H <sub>20</sub> O              | 2-Octylfuran                 | 4179-38-8  | 180 | 39.35  | 0.014 |
| C <sub>13</sub> H <sub>22</sub> O              | 2-Nonylfuran                 | x          | 194 | 46.40  | 0.003 |
| C <sub>15</sub> H <sub>26</sub> O              | 2-Undecylfuran               | 4082-56-8  | 222 | 73.76  | 0.003 |
| <b>Sulfonated compounds</b>                    |                              |            |     |        |       |
| H <sub>2</sub> S                               | Hydrogen sulfide             | 7783-06-4  | 34  | 3.11   | 0.003 |
| COS                                            | Carbonyl sulfide             | 463-58-1   | 60  | 3.88   | 0.003 |

|                                                |                            |            |     |       |        |
|------------------------------------------------|----------------------------|------------|-----|-------|--------|
| O <sub>2</sub> S                               | Sulfur dioxide             | 7446-09-5  | 64  | 5.03  | 0.160  |
| CS <sub>2</sub>                                | Carbon disulfide           | 75-15-0    | 76  | 8.46  | 0.003  |
| C <sub>2</sub> H <sub>6</sub> S <sub>2</sub>   | Dimethyl disulfide         | 624-92-0   | 94  | 16.37 | 0.001  |
| C <sub>7</sub> H <sub>10</sub> S               | 2-Propylthiophene          | 1551-27-5  | 126 | 26.48 | 0.003  |
| C <sub>9</sub> H <sub>14</sub> S               | 2-Pentylthiophene          | 4861-58-9  | 154 | 33.44 | 0.005  |
| C <sub>10</sub> H <sub>16</sub> S              | 2-Hexylthiophene           | 18794-77-9 | 168 | 36.69 | 0.002  |
| <b>Nitrogenated compounds</b>                  |                            |            |     |       |        |
| N <sub>2</sub>                                 | Nitrogen                   | 7727-37-9  | 28  | 1.87  | 0.250  |
| C <sub>5</sub> H <sub>9</sub> N                | 1-Isocyanobutane           | 2769-64-4  | 83  | 6.81  | 0.009  |
| CH <sub>3</sub> NO                             | Formamide                  | 75-12-7    | 45  | 8.43  | 0.004  |
| C <sub>2</sub> H <sub>5</sub> NO               | Acetamide                  | 60-35-5    | 59  | 15.29 | 0.069  |
| C <sub>5</sub> H <sub>5</sub> N                | Pyridine                   | 110-86-1   | 79  | 15.92 | 0.035  |
| C <sub>7</sub> H <sub>15</sub> N               | 1,2-Dimethylpiperidine     | 671-36-3   | 113 | 23.06 | 0.013  |
| C <sub>6</sub> H <sub>8</sub> N <sub>2</sub> O | 2-Methoxy-6-methylpyrazine | 2882-21-5  | 124 | 28.18 | 0.254  |
| C <sub>4</sub> H <sub>5</sub> NO <sub>2</sub>  | Succinimide                | 123-56-8   | 99  | 28.98 | 0.114  |
| C <sub>5</sub> H <sub>9</sub> NO               | 1-Methyl-2-pyrrolidone     | 872-50-4   | 99  | 30.91 | 0.008  |
| <b>Inorganic compounds</b>                     |                            |            |     |       |        |
| <i>Oxides</i>                                  |                            |            |     |       |        |
| CO <sub>2</sub>                                | Carbon dioxide             | 124-38-9   | 44  | 2.22  | 25.795 |
| H <sub>2</sub> O                               | Water                      | 7732-18-5  | 18  | 3.38  | 58.907 |

Note: <sup>1</sup>CAS/(NIST) – unique numerical identifier of chemical compounds included in the register Chemical Abstracts Service (<https://www.cas.org>) or NIST number (a unique number given to each spectrum in the NIST archive); <sup>2</sup>MW – nominal mass; <sup>3</sup>RT – retention time; <sup>4</sup>A – normalized area (the area ratio of the individual gas mixture components to the sum of the areas of all the components in the chromatogram).
